# Supplementary material
Source: PubMed Central journal article supplement (PMC11173003)

Shappell E, Hegarty C, Bord S, Egan DJ. Hawks and Doves in Standardized Letters of Evaluation: 6 years of rating distributions and trends in emergency medicine. *J Grad Med Educ.* 2024;16(3):328-331. DOI: <http://dx.doi.org/10.4300/JGME-D-23-00231.1>

**Supplementary Data**

**TABLE**

Number of Unique Dove/Hawk Categorizations and Range Dove/Hawk Categorizations per Institution, 2016-2021

| Unique Dove/Hawk Categories | Institutions |                               |     |     |     |     |
|-----------------------------|--------------|-------------------------------|-----|-----|-----|-----|
|                             | Total n (%)  | Range of Dove/Hawk Categories |     |     |     |     |
|                             |              | 0                             | 1   | 2   | 3   | 4   |
| 1                           | 7 (7)        | 7                             | N/A | N/A | N/A | N/A |
| 2                           | 53 (50)      | N/A                           | 47  | 6   | 0   | 0   |
| 3                           | 43 (41)      | N/A                           | 0   | 40  | 3   | 0   |
| 4                           | 2 (2)        | N/A                           | 0   | 0   | 2   | 0   |
| 5                           | 0 (0)        | N/A                           | 0   | 0   | 0   | 0   |

Shappell E, Hegarty C, Bord S, Egan DJ. Hawks and Doves in Standardized Letters of Evaluation: 6 years of rating distributions and trends in emergency medicine. *J Grad Med Educ.* 2024;16(3):328-331. DOI: <http://dx.doi.org/10.4300/JGME-D-23-00231.1>

**FIGURE 1**

Image of the Item Studied From the Emergency Medicine Standard Letter of Evaluation

**C. Global Assessment**

1. Compared to other EM residency candidates you have recommended in the last academic year, this candidate is in the:

| <u>Ranking</u>                   | # Recommended in each category last academic year |
|----------------------------------|---------------------------------------------------|
| <input type="radio"/> Top 10%    | <input type="text"/>                              |
| <input type="radio"/> Top 1/3    | <input type="text"/>                              |
| <input type="radio"/> Middle 1/3 | <input type="text"/>                              |
| <input type="radio"/> Lower 1/3  | <input type="text"/>                              |

Total Number of letters you wrote last year:

Shappell E, Hegarty C, Bord S, Egan DJ. Hawks and Doves in Standardized Letters of Evaluation: 6 years of rating distributions and trends in emergency medicine. *J Grad Med Educ.* 2024;16(3):328-331. DOI: <http://dx.doi.org/10.4300/JGME-D-23-00231.1>

**FIGURE 2**

Deviation in Emergency Medicine Standard Letter of Evaluation Rating Frequency From Established Guidelines by Year (2016-2021)

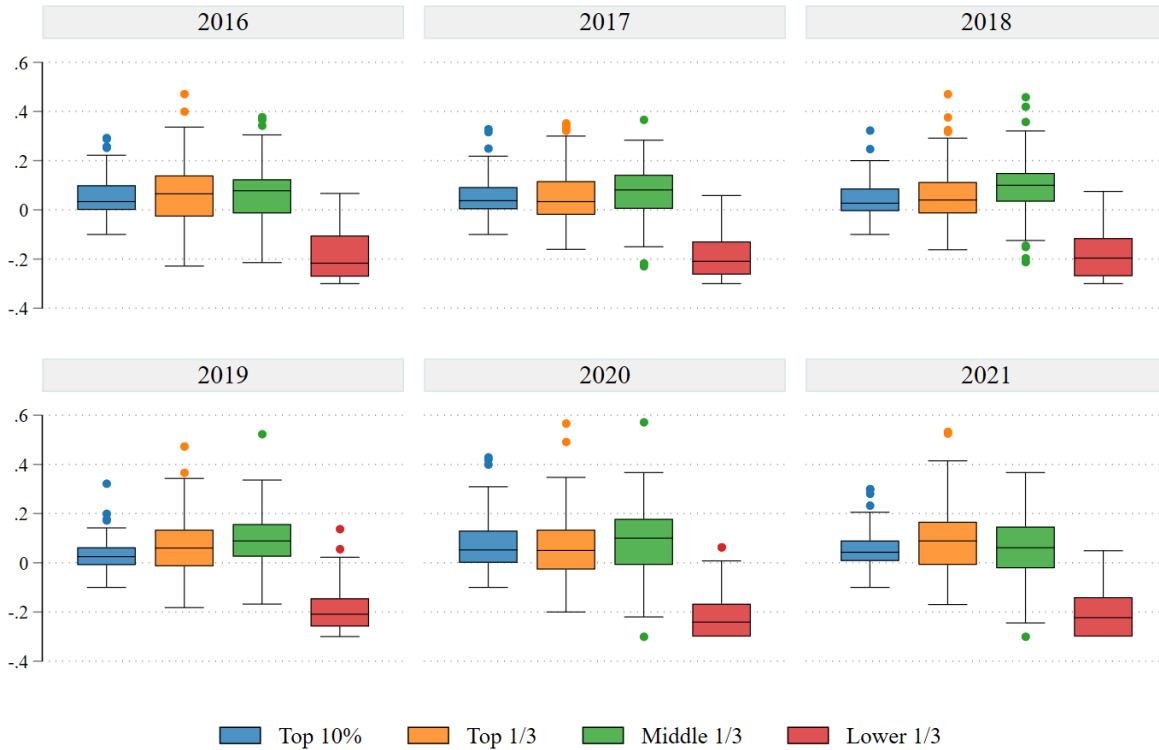

Shappell E, Hegarty C, Bord S, Egan DJ. Hawks and Doves in Standardized Letters of Evaluation: 6 years of rating distributions and trends in emergency medicine. *J Grad Med Educ.* 2024;16(3):328-331. DOI: <http://dx.doi.org/10.4300/JGME-D-23-00231.1>

**FIGURE 3**

Institutional Emergency Medicine Standard Letter of Evaluation Rating Distributions for Overall Performance (2016-2021)

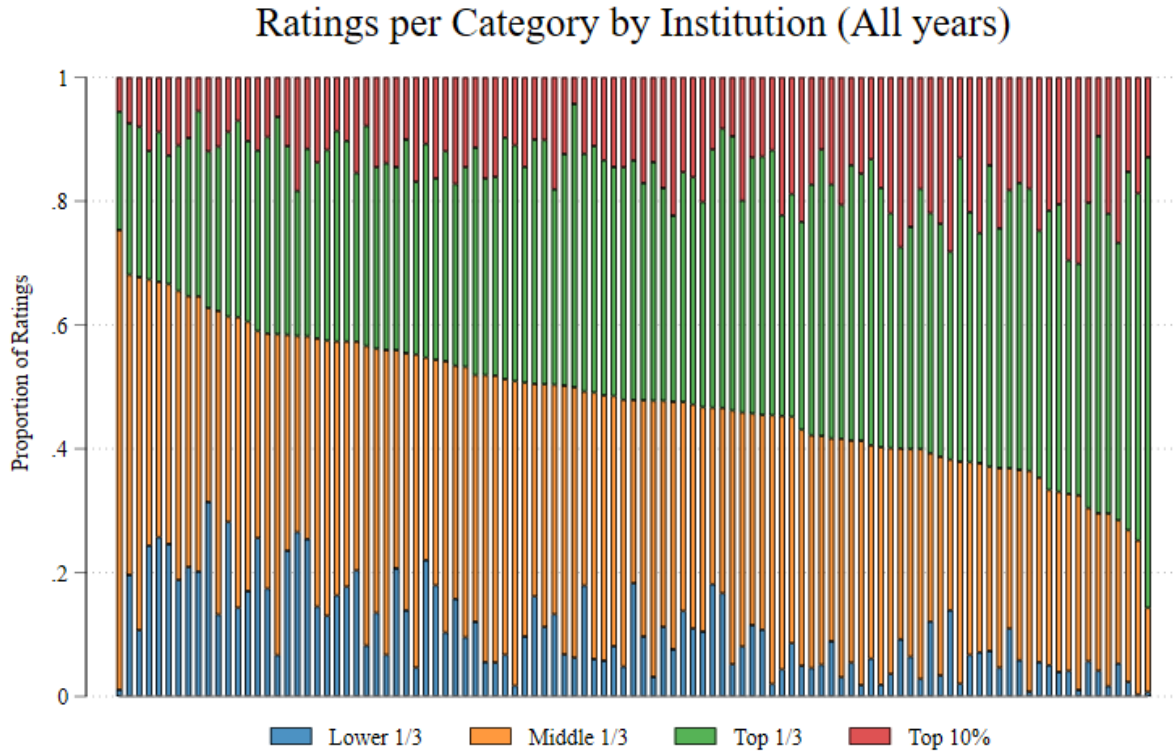

Supplement: JGMED23002311.pdf [file JGMED23002311.pdf]
